# Supplementary material
Source: publisher figshare collection journal article supplement (https://acs.figshare.com/ndownloader/files/6452163)
Supplement: Supplementary file 1 [file 6452163]

 
data_eddie30 
 
_audit_creation_method            SHELXL-97 
_chemical_name_systematic 
; 
 ? 
; 
_chemical_name_common             ? 
_chemical_melting_point           ? 
_chemical_formula_moiety          ? 
_chemical_formula_sum 
 'C34 H80 Co2 O31 P8 Ti2' 
_chemical_formula_weight          1446.40 
 
loop_ 
 _atom_type_symbol 
 _atom_type_description 
 _atom_type_scat_dispersion_real 
 _atom_type_scat_dispersion_imag 
 _atom_type_scat_source 
 'C'  'C'   0.0033   0.0016 
 'International Tables Vol C Tables 4.2.6.8 and 6.1.1.4' 
 'H'  'H'   0.0000   0.0000 
 'International Tables Vol C Tables 4.2.6.8 and 6.1.1.4' 
 'O'  'O'   0.0106   0.0060 
 'International Tables Vol C Tables 4.2.6.8 and 6.1.1.4' 
 'P'  'P'   0.1023   0.0942 
 'International Tables Vol C Tables 4.2.6.8 and 6.1.1.4' 
 'Ti'  'Ti'   0.2776   0.4457 
 'International Tables Vol C Tables 4.2.6.8 and 6.1.1.4' 
 'Co'  'Co'   0.3494   0.9721 
 'International Tables Vol C Tables 4.2.6.8 and 6.1.1.4' 
 
_symmetry_cell_setting            Monoclinic 
_symmetry_space_group_name_H-M    C2/c 
  
loop_ 
 _symmetry_equiv_pos_as_xyz 
 'x, y, z' 
 '-x, y, -z+1/2' 
 'x+1/2, y+1/2, z' 
 '-x+1/2, y+1/2, -z+1/2' 
 '-x, -y, -z' 
 'x, -y, z-1/2' 
 '-x+1/2, -y+1/2, -z' 
 'x+1/2, -y+1/2, z-1/2' 
  
_cell_length_a                    17.615(4) 
_cell_length_b                    18.853(4) 
_cell_length_c                    19.594(4) 
_cell_angle_alpha                 90.00 
_cell_angle_beta                  114.652(5) 
_cell_angle_gamma                 90.00 
_cell_volume                      5914(2) 
_cell_formula_units_Z             4 
_cell_measurement_temperature     100(2) 
_cell_measurement_reflns_used     854 
_cell_measurement_theta_min       2.29 
_cell_measurement_theta_max       20.86  
 
_exptl_crystal_description        'plate' 
_exptl_crystal_colour             'yellow'
_exptl_crystal_size_max           0.40 
_exptl_crystal_size_mid           0.30 
_exptl_crystal_size_min           0.06 
_exptl_crystal_density_meas       ? 
_exptl_crystal_density_diffrn     1.624 
_exptl_crystal_density_method     'not measured' 
_exptl_crystal_F_000              3000 
_exptl_absorpt_coefficient_mu     1.114 
_exptl_absorpt_correction_type    'multi-scan'
_exptl_absorpt_correction_T_min   0.80 
_exptl_absorpt_correction_T_max   1.00
_exptl_absorpt_process_details    'SADABS'
 
_exptl_special_details 
; 
 ? 
; 
 
_diffrn_ambient_temperature       100(2) 
_diffrn_radiation_wavelength      0.71073 
_diffrn_radiation_type            MoK\a 
_diffrn_radiation_source          'fine-focus sealed tube' 
_diffrn_radiation_monochromator   graphite 
_diffrn_measurement_device_type   ? 
_diffrn_measurement_method        ? 
_diffrn_detector_area_resol_mean  ? 
_diffrn_standards_number          ? 
_diffrn_standards_interval_count  ? 
_diffrn_standards_interval_time   ? 
_diffrn_standards_decay_%         ? 
_diffrn_reflns_number             13764 
_diffrn_reflns_av_R_equivalents   0.0981 
_diffrn_reflns_av_sigmaI/netI     0.1290 
_diffrn_reflns_limit_h_min        -20 
_diffrn_reflns_limit_h_max        12 
_diffrn_reflns_limit_k_min        -22 
_diffrn_reflns_limit_k_max        22 
_diffrn_reflns_limit_l_min        -23 
_diffrn_reflns_limit_l_max        23 
_diffrn_reflns_theta_min          1.67 
_diffrn_reflns_theta_max          24.79 
_reflns_number_total              4864 
_reflns_number_gt                 3018 
_reflns_threshold_expression      >2sigma(I) 
 
_computing_data_collection        ? 
_computing_cell_refinement        ? 
_computing_data_reduction         ? 
_computing_structure_solution     'SHELXS-97 (Sheldrick, 1990)' 
_computing_structure_refinement   'SHELXL-97 (Sheldrick, 1997)' 
_computing_molecular_graphics     ? 
_computing_publication_material   ? 
 
_refine_special_details 
; 
 Refinement of F^2^ against ALL reflections.  The weighted R-factor wR and 
 goodness of fit S are based on F^2^, conventional R-factors R are based 
 on F, with F set to zero for negative F^2^. The threshold expression of 
 F^2^ > 2sigma(F^2^) is used only for calculating R-factors(gt) etc. and is 
 not relevant to the choice of reflections for refinement.  R-factors based 
 on F^2^ are statistically about twice as large as those based on F, and R- 
 factors based on ALL data will be even larger. 
; 
 
_refine_ls_structure_factor_coef  Fsqd  
_refine_ls_matrix_type            full 
_refine_ls_weighting_scheme       calc  
_refine_ls_weighting_details 
 'calc w=1/[\s^2^(Fo^2^)+(0.0520P)^2^+0.0000P] where P=(Fo^2^+2Fc^2^)/3' 
_atom_sites_solution_primary      direct 
_atom_sites_solution_secondary    difmap 
_atom_sites_solution_hydrogens    geom 
_refine_ls_hydrogen_treatment     constr 
_refine_ls_extinction_method      none 
_refine_ls_extinction_coef        ? 
_refine_ls_number_reflns          4864 
_refine_ls_number_parameters      349 
_refine_ls_number_restraints      1 
_refine_ls_R_factor_all           0.1165 
_refine_ls_R_factor_gt            0.0613 
_refine_ls_wR_factor_ref          0.1373 
_refine_ls_wR_factor_gt           0.1173 
_refine_ls_goodness_of_fit_ref    1.003 
_refine_ls_restrained_S_all       1.007 
_refine_ls_shift/su_max           0.001 
_refine_ls_shift/su_mean          0.000 
 
loop_ 
 _atom_site_label 
 _atom_site_type_symbol 
 _atom_site_fract_x 
 _atom_site_fract_y 
 _atom_site_fract_z 
 _atom_site_U_iso_or_equiv 
 _atom_site_adp_type 
 _atom_site_occupancy 
 _atom_site_symmetry_multiplicity 
 _atom_site_calc_flag 
 _atom_site_refinement_flags 
 _atom_site_disorder_assembly 
 _atom_site_disorder_group 
Co1 Co 0.57483(6) 0.21508(4) 0.52365(5) 0.0155(2) Uani 1 1 d . . . 
Ti1 Ti 0.52348(7) 0.31969(5) 0.67445(6) 0.0141(3) Uani 1 1 d . . . 
P1 P 0.46651(11) 0.19917(8) 0.54625(9) 0.0163(4) Uani 1 1 d . . . 
P2 P 0.65488(11) 0.22233(8) 0.64165(9) 0.0157(4) Uani 1 1 d . . . 
P3 P 0.55774(11) 0.32834(8) 0.52227(9) 0.0156(4) Uani 1 1 d . . . 
P4 P 0.58636(11) 0.43628(8) 0.79841(9) 0.0155(4) Uani 1 1 d . . . 
O1 O 0.4496(3) 0.2539(2) 0.5961(2) 0.0177(10) Uani 1 1 d . . . 
O2 O 0.6147(3) 0.2504(2) 0.6922(2) 0.0183(10) Uani 1 1 d . . . 
O3 O 0.5521(3) 0.3601(2) 0.5913(2) 0.0178(10) Uani 1 1 d . . . 
O4 O 0.5000 0.2839(3) 0.7500 0.0140(13) Uani 1 2 d S . . 
O5 O 0.6002(3) 0.38878(19) 0.7410(2) 0.0153(9) Uani 1 1 d . . . 
O6 O 0.5000 0.4776(3) 0.7500 0.0174(14) Uani 1 2 d S . . 
O7 O 0.6529(3) 0.4884(2) 0.8355(2) 0.0207(10) Uani 1 1 d . . . 
O8 O 0.5656(3) 0.38857(19) 0.8523(2) 0.0149(9) Uani 1 1 d . . . 
O11 O 0.3798(3) 0.1885(2) 0.4740(2) 0.0215(10) Uani 1 1 d . . . 
O12 O 0.4742(3) 0.1237(2) 0.5841(2) 0.0216(11) Uani 1 1 d . . . 
O21 O 0.7013(3) 0.1507(2) 0.6801(2) 0.0201(10) Uani 1 1 d . . . 
O22 O 0.7351(3) 0.2695(2) 0.6537(2) 0.0205(10) Uani 1 1 d . . . 
O31 O 0.6246(3) 0.3739(2) 0.5064(2) 0.0221(11) Uani 1 1 d . . . 
O32 O 0.4743(3) 0.3445(2) 0.4502(2) 0.0212(10) Uani 1 1 d . . . 
C1 C 0.5377(5) 0.1973(3) 0.4096(4) 0.0252(16) Uani 1 1 d . . . 
H1A H 0.4902 0.2208 0.3676 0.030 Uiso 1 1 calc R . . 
C2 C 0.5338(5) 0.1329(3) 0.4464(4) 0.0239(16) Uani 1 1 d . . . 
H2A H 0.4829 0.1031 0.4348 0.029 Uiso 1 1 calc R . . 
C3 C 0.6162(5) 0.1178(3) 0.5014(4) 0.0226(16) Uani 1 1 d . . . 
H3A H 0.6338 0.0757 0.5355 0.027 Uiso 1 1 calc R . . 
C4 C 0.6672(4) 0.1727(3) 0.4978(4) 0.0247(16) Uani 1 1 d . . . 
H4A H 0.7285 0.1767 0.5298 0.030 Uiso 1 1 calc R . . 
C5 C 0.6207(5) 0.2200(3) 0.4415(4) 0.0259(17) Uani 1 1 d . . . 
H5A H 0.6428 0.2634 0.4267 0.031 Uiso 1 1 calc R . . 
C11 C 0.3262(5) 0.2475(3) 0.4339(4) 0.0270(17) Uani 1 1 d . . . 
H11A H 0.3450 0.2675 0.3968 0.032 Uiso 1 1 calc R . . 
H11B H 0.3284 0.2855 0.4696 0.032 Uiso 1 1 calc R . . 
C12 C 0.2383(4) 0.2193(4) 0.3946(4) 0.0335(18) Uani 1 1 d . . . 
H12A H 0.2007 0.2579 0.3672 0.050 Uiso 1 1 calc R . . 
H12B H 0.2204 0.1998 0.4318 0.050 Uiso 1 1 calc R . . 
H12C H 0.2369 0.1820 0.3593 0.050 Uiso 1 1 calc R . . 
C13 C 0.4197(5) 0.1041(3) 0.6196(4) 0.0333(18) Uani 1 1 d . . . 
H13A H 0.3606 0.1119 0.5844 0.040 Uiso 1 1 calc R . . 
H13B H 0.4320 0.1338 0.6647 0.040 Uiso 1 1 calc R . . 
C14 C 0.4335(5) 0.0287(3) 0.6411(4) 0.0342(19) Uani 1 1 d . . . 
H14A H 0.3969 0.0147 0.6652 0.051 Uiso 1 1 calc R . . 
H14B H 0.4919 0.0215 0.6762 0.051 Uiso 1 1 calc R . . 
H14C H 0.4208 -0.0004 0.5962 0.051 Uiso 1 1 calc R . . 
C21 C 0.6606(5) 0.0958(3) 0.7051(4) 0.0255(16) Uani 1 1 d . . . 
H21A H 0.6257 0.0654 0.6624 0.031 Uiso 1 1 calc R . . 
H21B H 0.6244 0.1175 0.7268 0.031 Uiso 1 1 calc R . . 
C22 C 0.7287(6) 0.0526(4) 0.7637(5) 0.044(2) Uani 1 1 d . . . 
H22A H 0.7036 0.0148 0.7820 0.066 Uiso 1 1 calc R . . 
H22B H 0.7627 0.0833 0.8057 0.066 Uiso 1 1 calc R . . 
H22C H 0.7641 0.0315 0.7416 0.066 Uiso 1 1 calc R . . 
C23 C 0.7959(6) 0.2825(5) 0.7286(4) 0.065(3) Uani 1 1 d D . . 
H23A H 0.7692 0.2728 0.7632 0.078 Uiso 1 1 d R . . 
H23B H 0.8440 0.2499 0.7424 0.078 Uiso 1 1 d R . . 
C24 C 0.8258(10) 0.3557(5) 0.7443(6) 0.146(8) Uani 1 1 d D . . 
H24A H 0.8648 0.3600 0.7972 0.219 Uiso 1 1 calc R . . 
H24B H 0.7783 0.3876 0.7336 0.219 Uiso 1 1 calc R . . 
H24C H 0.8544 0.3685 0.7125 0.219 Uiso 1 1 calc R . . 
C31 C 0.6871(5) 0.4197(3) 0.5603(4) 0.0264(17) Uani 1 1 d . . . 
H31A H 0.7395 0.3930 0.5875 0.032 Uiso 1 1 calc R . . 
H31B H 0.6671 0.4375 0.5975 0.032 Uiso 1 1 calc R . . 
C32 C 0.7023(5) 0.4801(3) 0.5188(4) 0.0318(18) Uani 1 1 d . . . 
H32A H 0.7440 0.5120 0.5544 0.048 Uiso 1 1 calc R . . 
H32B H 0.6500 0.5060 0.4919 0.048 Uiso 1 1 calc R . . 
H32C H 0.7229 0.4620 0.4828 0.048 Uiso 1 1 calc R . . 
C33 C 0.4429(6) 0.4163(3) 0.4347(4) 0.038(2) Uani 1 1 d . . . 
H33A H 0.4726 0.4464 0.4793 0.045 Uiso 1 1 calc R . . 
H33B H 0.3827 0.4168 0.4236 0.045 Uiso 1 1 calc R . . 
C34 C 0.4551(6) 0.4443(4) 0.3712(5) 0.048(2) Uani 1 1 d . . . 
H34A H 0.4339 0.4930 0.3612 0.073 Uiso 1 1 calc R . . 
H34B H 0.4249 0.4148 0.3269 0.073 Uiso 1 1 calc R . . 
H34C H 0.5148 0.4441 0.3826 0.073 Uiso 1 1 calc R . . 
O1W O 0.8285(3) 0.4603(3) 0.9114(3) 0.0452(14) Uani 1 1 d . . . 
H1WA H 0.7798 0.4668 0.9092 0.054 Uiso 1 1 d R . . 
H1WB H 0.8383 0.4161 0.9144 0.054 Uiso 1 1 d R . . 
O2W O 0.5000 0.2904(3) 0.2500 0.0410(19) Uani 1 2 d S . . 
H2WA H 0.5427 0.3166 0.2713 0.049 Uiso 1 1 d R . . 
O3W O 0.6455(3) 0.6336(2) 0.8448(3) 0.0291(12) Uani 1 1 d . . . 
H3WA H 0.6371 0.5891 0.8433 0.035 Uiso 1 1 d R . . 
H3WB H 0.6755 0.6424 0.8214 0.035 Uiso 1 1 d R . . 
 
loop_ 
 _atom_site_aniso_label 
 _atom_site_aniso_U_11 
 _atom_site_aniso_U_22 
 _atom_site_aniso_U_33 
 _atom_site_aniso_U_23 
 _atom_site_aniso_U_13 
 _atom_site_aniso_U_12 
Co1 0.0147(5) 0.0181(5) 0.0141(5) -0.0018(4) 0.0066(4) 0.0002(4) 
Ti1 0.0112(6) 0.0179(6) 0.0140(6) -0.0017(5) 0.0060(5) -0.0003(5) 
P1 0.0152(10) 0.0163(8) 0.0167(9) -0.0015(7) 0.0059(8) -0.0005(7) 
P2 0.0126(9) 0.0192(8) 0.0161(9) 0.0006(7) 0.0066(7) 0.0019(7) 
P3 0.0151(9) 0.0183(8) 0.0136(9) -0.0001(7) 0.0062(8) 0.0006(7) 
P4 0.0131(9) 0.0172(8) 0.0166(9) -0.0016(7) 0.0066(7) -0.0011(7) 
O1 0.016(3) 0.024(2) 0.016(2) -0.0052(18) 0.010(2) -0.0033(19) 
O2 0.017(3) 0.025(2) 0.014(2) 0.0008(18) 0.007(2) 0.0058(19) 
O3 0.022(3) 0.015(2) 0.019(2) -0.0008(18) 0.012(2) 0.0026(19) 
O4 0.010(3) 0.019(3) 0.014(3) 0.000 0.005(3) 0.000 
O5 0.010(2) 0.020(2) 0.018(2) -0.0048(18) 0.009(2) -0.0032(19) 
O6 0.019(4) 0.015(3) 0.018(3) 0.000 0.008(3) 0.000 
O7 0.019(3) 0.024(2) 0.021(3) 0.0001(19) 0.010(2) -0.004(2) 
O8 0.008(2) 0.020(2) 0.014(2) -0.0020(18) 0.0018(19) -0.0011(18) 
O11 0.014(3) 0.024(2) 0.018(2) -0.0049(19) -0.002(2) 0.000(2) 
O12 0.024(3) 0.019(2) 0.026(3) 0.0013(19) 0.014(2) -0.004(2) 
O21 0.020(3) 0.022(2) 0.021(3) 0.0042(19) 0.011(2) 0.004(2) 
O22 0.020(3) 0.027(2) 0.015(2) -0.0049(19) 0.007(2) -0.002(2) 
O31 0.028(3) 0.025(2) 0.018(3) -0.0020(19) 0.013(2) -0.006(2) 
O32 0.020(3) 0.019(2) 0.016(2) -0.0009(18) -0.001(2) 0.004(2) 
C1 0.033(5) 0.028(4) 0.010(3) -0.004(3) 0.005(3) 0.008(3) 
C2 0.034(5) 0.019(3) 0.025(4) -0.012(3) 0.019(4) -0.008(3) 
C3 0.030(4) 0.019(3) 0.020(4) -0.003(3) 0.012(3) 0.015(3) 
C4 0.015(4) 0.038(4) 0.024(4) -0.015(3) 0.011(3) 0.003(3) 
C5 0.033(5) 0.029(4) 0.028(4) -0.013(3) 0.026(4) -0.008(4) 
C11 0.027(4) 0.031(4) 0.022(4) 0.003(3) 0.009(4) 0.003(3) 
C12 0.016(4) 0.050(5) 0.027(4) -0.008(4) 0.002(3) 0.000(4) 
C13 0.027(5) 0.031(4) 0.048(5) 0.006(4) 0.022(4) -0.005(3) 
C14 0.036(5) 0.033(4) 0.044(5) 0.007(4) 0.026(4) -0.004(4) 
C21 0.025(4) 0.025(4) 0.030(4) 0.004(3) 0.015(4) 0.002(3) 
C22 0.043(6) 0.057(5) 0.038(5) 0.014(4) 0.022(5) 0.001(4) 
C23 0.040(6) 0.129(9) 0.017(4) 0.000(5) 0.002(4) -0.046(6) 
C24 0.218(19) 0.062(7) 0.046(8) 0.017(6) -0.056(9) -0.047(9) 
C31 0.029(4) 0.025(4) 0.027(4) -0.001(3) 0.013(4) -0.011(3) 
C32 0.034(5) 0.032(4) 0.030(4) -0.002(3) 0.013(4) -0.011(3) 
C33 0.041(5) 0.031(4) 0.032(5) -0.002(3) 0.007(4) 0.005(4) 
C34 0.062(7) 0.047(5) 0.044(6) 0.008(4) 0.030(5) 0.011(5) 
O1W 0.026(3) 0.038(3) 0.067(4) 0.001(3) 0.015(3) 0.000(3) 
O2W 0.032(5) 0.031(4) 0.049(5) 0.000 0.005(4) 0.000 
O3W 0.028(3) 0.023(2) 0.038(3) 0.001(2) 0.015(3) -0.004(2) 
 
_geom_special_details 
; 
 All esds (except the esd in the dihedral angle between two l.s. planes) 
 are estimated using the full covariance matrix.  The cell esds are taken 
 into account individually in the estimation of esds in distances, angles 
 and torsion angles; correlations between esds in cell parameters are only 
 used when they are defined by crystal symmetry.  An approximate (isotropic) 
 treatment of cell esds is used for estimating esds involving l.s. planes. 
; 
 
loop_ 
 _geom_bond_atom_site_label_1 
 _geom_bond_atom_site_label_2 
 _geom_bond_distance 
 _geom_bond_site_symmetry_2 
 _geom_bond_publ_flag 
Co1 C4 2.056(6) . ? 
Co1 C2 2.074(6) . ? 
Co1 C1 2.077(6) . ? 
Co1 C5 2.083(6) . ? 
Co1 C3 2.086(6) . ? 
Co1 P1 2.1523(19) . ? 
Co1 P2 2.1524(19) . ? 
Co1 P3 2.1550(18) . ? 
Ti1 O4 1.824(2) . ? 
Ti1 O8 1.933(4) 2_656 ? 
Ti1 O5 1.937(4) . ? 
Ti1 O1 1.980(4) . ? 
Ti1 O2 1.986(4) . ? 
Ti1 O3 2.042(4) . ? 
Ti1 Ti1 3.390(2) 2_656 ? 
P1 O1 1.533(4) . ? 
P1 O12 1.585(4) . ? 
P1 O11 1.604(5) . ? 
P2 O2 1.532(4) . ? 
P2 O21 1.595(4) . ? 
P2 O22 1.601(5) . ? 
P3 O3 1.520(4) . ? 
P3 O32 1.587(5) . ? 
P3 O31 1.589(4) . ? 
P4 O7 1.469(5) . ? 
P4 O5 1.535(4) . ? 
P4 O8 1.542(4) . ? 
P4 O6 1.618(3) . ? 
O4 Ti1 1.824(2) 2_656 ? 
O6 P4 1.618(3) 2_656 ? 
O8 Ti1 1.933(4) 2_656 ? 
O11 C11 1.459(8) . ? 
O12 C13 1.448(7) . ? 
O21 C21 1.456(7) . ? 
O22 C23 1.431(9) . ? 
O31 C31 1.450(8) . ? 
O32 C33 1.445(7) . ? 
C1 C5 1.396(10) . ? 
C1 C2 1.428(9) . ? 
C2 C3 1.430(10) . ? 
C3 C4 1.393(9) . ? 
C4 C5 1.389(10) . ? 
C11 C12 1.508(10) . ? 
C13 C14 1.475(9) . ? 
C21 C22 1.508(10) . ? 
C23 C24 1.463(6) . ? 
C31 C32 1.487(8) . ? 
C33 C34 1.447(10) . ? 
 
loop_ 
 _geom_angle_atom_site_label_1 
 _geom_angle_atom_site_label_2 
 _geom_angle_atom_site_label_3 
 _geom_angle 
 _geom_angle_site_symmetry_1 
 _geom_angle_site_symmetry_3 
 _geom_angle_publ_flag 
C4 Co1 C2 66.5(3) . . ? 
C4 Co1 C1 66.3(3) . . ? 
C2 Co1 C1 40.2(2) . . ? 
C4 Co1 C5 39.2(3) . . ? 
C2 Co1 C5 66.3(3) . . ? 
C1 Co1 C5 39.2(3) . . ? 
C4 Co1 C3 39.3(3) . . ? 
C2 Co1 C3 40.2(3) . . ? 
C1 Co1 C3 67.3(3) . . ? 
C5 Co1 C3 66.2(3) . . ? 
C4 Co1 P1 149.0(2) . . ? 
C2 Co1 P1 88.7(2) . . ? 
C1 Co1 P1 106.9(2) . . ? 
C5 Co1 P1 145.9(2) . . ? 
C3 Co1 P1 109.7(2) . . ? 
C4 Co1 P2 93.3(2) . . ? 
C2 Co1 P2 134.8(2) . . ? 
C1 Co1 P2 159.6(2) . . ? 
C5 Co1 P2 122.4(2) . . ? 
C3 Co1 P2 98.7(2) . . ? 
P1 Co1 P2 91.58(7) . . ? 
C4 Co1 P3 120.2(2) . . ? 
C2 Co1 P3 136.6(2) . . ? 
C1 Co1 P3 99.63(18) . . ? 
C5 Co1 P3 92.50(19) . . ? 
C3 Co1 P3 158.1(2) . . ? 
P1 Co1 P3 90.55(6) . . ? 
P2 Co1 P3 88.63(7) . . ? 
O4 Ti1 O8 92.00(16) . 2_656 ? 
O4 Ti1 O5 91.88(16) . . ? 
O8 Ti1 O5 89.42(17) 2_656 . ? 
O4 Ti1 O1 95.72(16) . . ? 
O8 Ti1 O1 90.82(18) 2_656 . ? 
O5 Ti1 O1 172.38(16) . . ? 
O4 Ti1 O2 93.19(16) . . ? 
O8 Ti1 O2 174.52(17) 2_656 . ? 
O5 Ti1 O2 92.18(18) . . ? 
O1 Ti1 O2 86.90(17) . . ? 
O4 Ti1 O3 178.90(16) . . ? 
O8 Ti1 O3 88.60(16) 2_656 . ? 
O5 Ti1 O3 87.20(17) . . ? 
O1 Ti1 O3 85.20(17) . . ? 
O2 Ti1 O3 86.24(16) . . ? 
O4 Ti1 Ti1 21.68(15) . 2_656 ? 
O8 Ti1 Ti1 76.73(12) 2_656 2_656 ? 
O5 Ti1 Ti1 76.59(11) . 2_656 ? 
O1 Ti1 Ti1 110.87(12) . 2_656 ? 
O2 Ti1 Ti1 108.75(12) . 2_656 ? 
O3 Ti1 Ti1 158.07(11) . 2_656 ? 
O1 P1 O12 107.9(2) . . ? 
O1 P1 O11 106.2(2) . . ? 
O12 P1 O11 99.5(2) . . ? 
O1 P1 Co1 117.49(18) . . ? 
O12 P1 Co1 108.18(18) . . ? 
O11 P1 Co1 115.82(17) . . ? 
O2 P2 O21 105.8(2) . . ? 
O2 P2 O22 109.3(2) . . ? 
O21 P2 O22 98.8(2) . . ? 
O2 P2 Co1 116.38(19) . . ? 
O21 P2 Co1 115.49(18) . . ? 
O22 P2 Co1 109.63(17) . . ? 
O3 P3 O32 109.6(2) . . ? 
O3 P3 O31 106.9(2) . . ? 
O32 P3 O31 102.1(2) . . ? 
O3 P3 Co1 116.09(17) . . ? 
O32 P3 Co1 105.94(16) . . ? 
O31 P3 Co1 115.28(17) . . ? 
O7 P4 O5 114.5(2) . . ? 
O7 P4 O8 114.9(2) . . ? 
O5 P4 O8 108.5(2) . . ? 
O7 P4 O6 109.2(2) . . ? 
O5 P4 O6 104.4(2) . . ? 
O8 P4 O6 104.4(2) . . ? 
P1 O1 Ti1 132.5(3) . . ? 
P2 O2 Ti1 132.2(3) . . ? 
P3 O3 Ti1 133.8(2) . . ? 
Ti1 O4 Ti1 136.6(3) 2_656 . ? 
P4 O5 Ti1 127.3(2) . . ? 
P4 O6 P4 122.4(3) 2_656 . ? 
P4 O8 Ti1 127.2(3) . 2_656 ? 
C11 O11 P1 123.0(4) . . ? 
C13 O12 P1 120.6(4) . . ? 
C21 O21 P2 122.2(4) . . ? 
C23 O22 P2 118.9(4) . . ? 
C31 O31 P3 125.4(4) . . ? 
C33 O32 P3 119.9(4) . . ? 
C5 C1 C2 107.3(6) . . ? 
C5 C1 Co1 70.6(4) . . ? 
C2 C1 Co1 69.8(4) . . ? 
C1 C2 C3 107.6(6) . . ? 
C1 C2 Co1 70.0(3) . . ? 
C3 C2 Co1 70.3(4) . . ? 
C4 C3 C2 106.7(6) . . ? 
C4 C3 Co1 69.2(3) . . ? 
C2 C3 Co1 69.5(3) . . ? 
C5 C4 C3 109.8(7) . . ? 
C5 C4 Co1 71.4(4) . . ? 
C3 C4 Co1 71.5(4) . . ? 
C4 C5 C1 108.6(6) . . ? 
C4 C5 Co1 69.3(3) . . ? 
C1 C5 Co1 70.2(4) . . ? 
O11 C11 C12 107.6(5) . . ? 
O12 C13 C14 108.6(5) . . ? 
O21 C21 C22 107.1(6) . . ? 
O22 C23 C24 115.4(8) . . ? 
O31 C31 C32 108.2(6) . . ? 
O32 C33 C34 110.0(6) . . ? 
 
_diffrn_measured_fraction_theta_max    0.957 
_diffrn_reflns_theta_full              24.79 
_diffrn_measured_fraction_theta_full   0.957 
_refine_diff_density_max    0.928 
_refine_diff_density_min   -0.794 
_refine_diff_density_rms    0.117 
